# Supplementary material for: High Pressure Processing vs. Thermal Pasteurization of Whole Concord Grape Puree: Effect on Nutritional Value, Quality Parameters and Refrigerated Shelf Life
Source: MDPI journal article supplement (doi:10.3390/foods10112608), 2021-10-28
Supplement: s1 [file s1]

# Supplementary data

Table S1. Color attributes of control, HPP- and HT- treated puree during 4 months of storage at 4 °C.

| Color characteristics |         | Storage time (months) |                |                 |                 |                 |
|-----------------------|---------|-----------------------|----------------|-----------------|-----------------|-----------------|
|                       |         | 0                     | 1              | 2               | 3               | 4               |
| L*                    | Control | 10.9 ± 0.5 a          | -              | -               | -               | -               |
|                       | HPP     | 10.7 ± 0.1 aXY        | 10.3 ± 0.1 aZ  | 10.6 ± 0.1 aYZ  | 11.1 ± 0.2 aX   | 10.9 ± 0.3 aXY  |
|                       | HT      | 10.1 ± 0.5 aXY        | 9.1 ± 0.3 bX   | 10.8 ± 0.3 aY   | 10.9 ± 0.6 aY   | 11.3 ± 0.8 aY   |
| a*                    | Control | 16.7 ± 0.4 a          | -              | -               | -               | -               |
|                       | HPP     | 16.1 ± 0.4 aXY        | 16.5 ± 0.1 aXY | 16.0 ± 0.1 aX   | 16.7 ± 0.2 aY   | 16.6 ± 0.2 aY   |
|                       | HT      | 17.5 ± 0.1 aX         | 17.6 ± 0.3 bX  | 17.1 ± 0.1 bX   | 17.3 ± 0.4 aX   | 17.1 ± 0.1 bX   |
| b*                    | Control | 2.9 ± 0.2 ab          | -              | -               | -               | -               |
|                       | HPP     | 2.7 ± 0.1 aX          | 2.7 ± 0.1 aX   | 2.8 ± 0.0 aX    | 3.3 ± 0.2 aY    | 3.0 ± 0.2 aXY   |
|                       | HT      | 3.5 ± 0.3 bZ          | 3.5 ± 0.0 bZ   | 3.7 ± 0.1 bYZ   | 4.1 ± 0.0 bX    | 4.0 ± 0.1 bXY   |
| ΔE                    | HPP     | 1.4 ± 0.0 aX          | 1.8 ± 0.1 aY   | 1.4 ± 0.1 aXY   | 1.0 ± 0.3 aX    | 1.3 ± 0.2 aX    |
|                       | HT      | 2.1 ± 0.4 aXY         | 3.1 ± 0.4 bX   | 1.5 ± 0.4 aY    | 1.7 ± 0.6 aY    | 1.4 ± 0.4 aY    |
| BI                    | Control | 119.3 ± 7.1 a         | -              | -               | -               | -               |
|                       | HPP     | 115.0 ± 3.4 aX        | 121.5 ± 0.5 aY | 118.0 ± 1.2 aXY | 122.3 ± 3.1 aY  | 120.1 ± 1.0 aXY |
|                       | HT      | 138.0 ± 2.4 bY        | 153.8 ± 5.9 bX | 132.3 ± 6.3 bY  | 138.8 ± 8.9 bXY | 131.7 ± 7.0 bY  |

<sup>a</sup> Different lowercase letters indicate significant difference among treatments at each predefined sampling point; different uppercase letters indicate significant difference during storage for HPP- (600 MPa, 3 min) or HT- (63 °C, 3 min) treated sample.

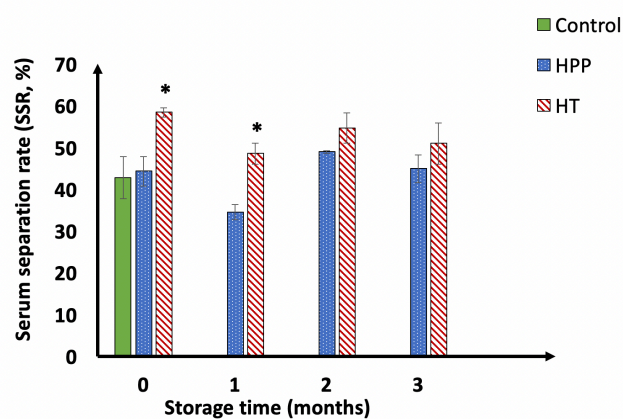

Figure S1. Results of serum separation rate (SSR, %) of control, HPP- (600 MPa, 3 min) and HT- (63 °C, 3 min) treated sample during 3-month storage at 4 °C.

<sup>a</sup> Denotation of “\*” indicates significant difference among treatments (p<0.05) at each sampling point.

Table S2. Proximate composition analysis of Concord grape puree made by different processes (as dry matter).

|                       | Dry matter      |                |                |                |
|-----------------------|-----------------|----------------|----------------|----------------|
|                       | Contrl / W      | Control /O     | HPP / W        | HT / W         |
| Moisture (%)          | -               | -              | -              | -              |
| Dry matter (%)        | -               | -              | -              | -              |
| Crude protein (%)     | 3.90 ± 0.16 A   | 3.23 ± 0.05 B  | 3.67 ± 0.05 A  | 3.90 ± 0.14 A  |
| Crude Fiber (%)       | 10.63 ± 0.33 a  | 2.50 ± 0.22 b  | 10.07 ± 0.05 a | 10.17 ± 0.48 a |
| WSC (%)               | 59.93 ± 3.03 A  | 64.77 ± 3.89 A | 59.37 ± 4.11 A | 63.40 ± 5.51 A |
| Total Fatty acids (%) | 1.19 ± 0.13 a   | 0.29 ± 0.05 b  | 1.12 ± 0.09 a  | 1.26 ± 0.05 a  |
| RUFAL (%)             | 1.01 ± 0.11 a   | 0.21 ± 0.04 b  | 0.95 ± 0.07 a  | 1.07 ± 0.04 a  |
| Ash (%)               | 3.87 ± 0.40 A   | 5.27 ± 1.01 A  | 3.67 ± 0.47 A  | 4.51 ± 0.31 A  |
| Calcium (%)           | 0.07 ± 0.00 a   | 0.05 ± 0.00 b  | 0.08 ± 0.00 a  | 0.08 ± 0.00 a  |
| Phosphorus (%)        | 0.10 ± 0.00 a   | 0.08 ± 0.00 b  | 0.10 ± 0.00 a  | 0.10 ± 0.00 a  |
| Magnesium (%)         | 0.05 ± 0.00 A   | 0.04 ± 0.00 B  | 0.05 ± 0.00 A  | 0.05 ± 0.00 A  |
| Potassium (%)         | 1.39 ± 0.04 A   | 1.63 ± 0.00 B  | 1.3 ± 0.08 A   | 1.45 ± 0.03 A  |
| Sodium (%)            | 0.00 ± 0.00 A   | 0.00 ± 0.00 A  | 0.01 ± 0.00 A  | 0.00 ± 0.00 A  |
| Iron (ppm)            | 25.33 ± 13.22 A | 13.00 ± 2.83 A | 20.67 ± 3.40 A | 13.67 ± 1.25 A |
| Zinc (ppm)            | 4.00 ± 0.00 A   | 3.67 ± 0.47 A  | 3.33 ± 0.47 A  | 4.00 ± 0.82 A  |
| Copper (ppm)          | 6.00 ± 0.00 A   | 6.00 ± 0.00 A  | 7.00 ± 0.00 B  | 6.00 ± 0.00 A  |
| Manganese (ppm)       | 11.00 ± 0.00 A  | 8.67 ± 0.47 B  | 10.67 ± 0.47 A | 11.33 ± 0.47 A |
| Molybdenum (ppm)      | <1.00 A         | <1.00 A        | <1.00 A        | <1.00 A        |

<sup>a</sup>Different uppercase letters indicate significant differences among different treatments ( $p < 0.05$ ); different lowercase letters indicate significant differences among different treatments ( $p < 0.001$ ). Control/O: untreated samples without seeds; Control/W: untreated samples with seeds; HPP/W: HPP- (600 MPa, 3 min) treated samples with seeds; HT/W: HT- (63 °C, 3 min) treated samples with seeds; WSC: water soluble carbohydrate; TFA: total fatty acids; RUFAL: rumen unsaturated fatty acids. "-" means not determined.

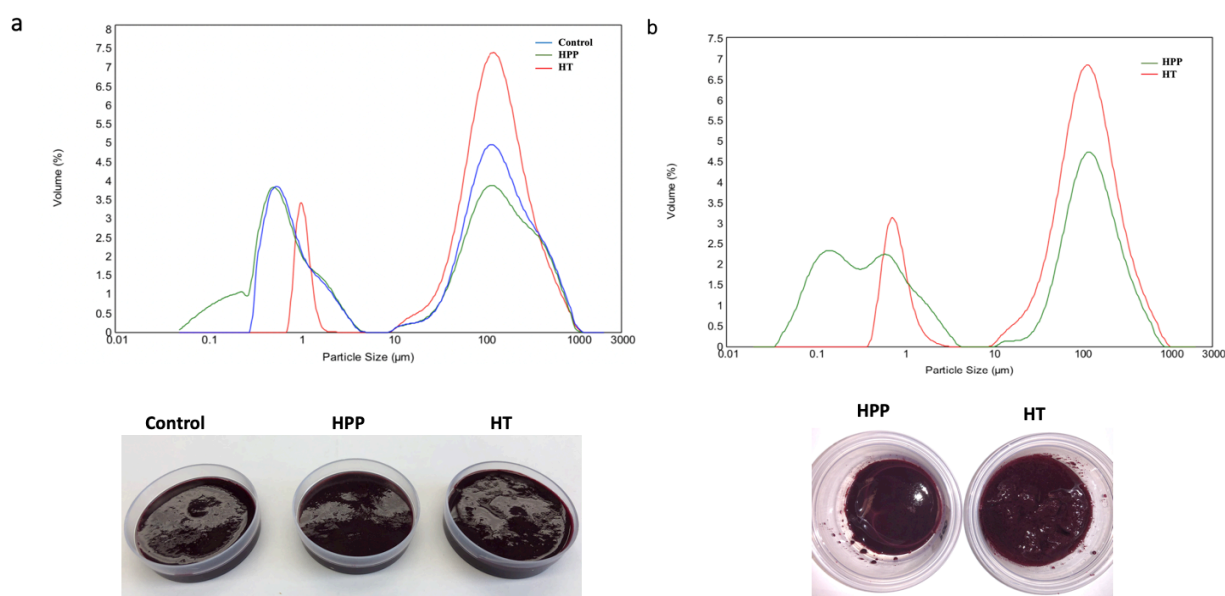

Figure S2. Particle size distribution (top) and visual appearance (bottom) of control, HPP- (600 MPa, 3 min) and HT- (63 °C, 3 min) treated puree at day 1 (a) and after 4-month refrigerated storage (b).
